# Supplementary material for: Evidence that the stress hormone cortisol regulates biofilm formation differently among Flavobacterium columnare isolates
Source: PubMed Central journal article supplement (PMC6458827; doi:10.1186/s13567-019-0641-3), 2019-04-11

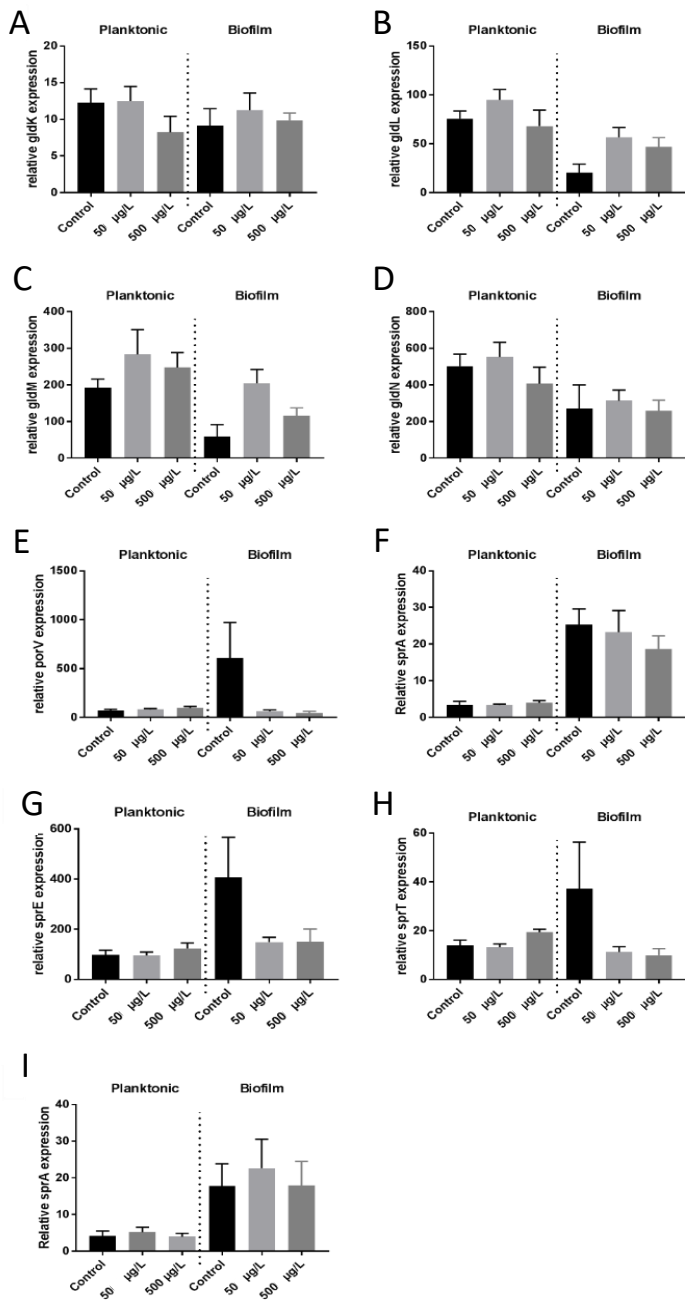

Supplement: 13567_2019_641_MOESM2_ESM.pdf [file 13567_2019_641_MOESM2_ESM.pdf]
